# Supplementary material for: Tranexamic Acid in Chronic Subdural Hematomas (TRACS): study protocol for a randomized controlled trial
Source: Springer Nature journal article supplement (doi:10.1186/s13063-016-1358-5), 2016-05-05
Supplement: MOESM4 [file 10111858]

**RESEARCH INFORMATION AND CONSENT FORM**

**Project title:** Tranexamic acid as a medical treatment for chronic subdural hematomas

**Study number:** 14-213

**Principal instigator:** Dr. David Mathieu, M.D.  
Neurosurgery Division  
Department of Surgery

**Co-investigators:** Dr. Christian Iorio-Morin, M.D., Ph.D., R2  
Neurosurgery Division  
Department of Surgery

Dr. Jocelyn Blanchard, M.D.  
Neurosurgery Division  
Department of Surgery

**IN CASE OF EMERGENCY**

**From Monday through Friday, from 8 a.m. to 5 p.m., you can reach:**

|                               |                                                                                              |
|-------------------------------|----------------------------------------------------------------------------------------------|
| Dr. Christian Iorio-Morin, R2 | Tel.: (819) 346-1110, dial « 0 » and ask the operator to call his pager #9721                |
| Ms. Josée Soucy, R.N.,        | Telephone: 819-346-1110 ext.16364 or dial "0" and ask the operator to call her pager # 8359. |
| Ms. Josée Ducharme, R.N.,     | Telephone: 819-346-1110 ext.16369 or dial "0" and ask the operator to call her pager # 8423. |

**Outside office hours, please go to the closest emergency room and inform the ER that you are participating in a research project.**

**PREAMBLE FOR SUBSTITUTE CONSENT**

This project is designed for adults who, because of their health condition, may not be able to decide whether or not they should participate. In such a case, the law authorizes the spouse to give consent for the patient; if he/she is unavailable or incapable of giving it, a close relative or a person who shows a special interest for the patient can do so. If you are that person, we will ask you, should the case arise, to sign the consent form that will indicate your agreement to the subject's participation in this research project. The decision you make must be consistent with the subject's interests and take into account, as much as possible, any wish he may have expressed in the past.

For an easier reading, the pronoun "you" in the rest of the text indicates the person you represent.

1 **INTRODUCTION**

2 We are asking for your participation in a research study, because you have been  
3 diagnosed with a chronic subdural hematoma. However, before you accept to participate  
4 in this study, take the time to read, understand and carefully think about the following  
5 information. If you accept to take part in this research study, you will have to sign the  
6 consent form at the end of this document and we will give you a signed copy for your  
7 own records.

8  
9 In this Information and Consent Form you will find explanations about the goals of the  
10 study, its procedures, risks, inconveniences and advantages as well as the names of the  
11 persons you may contact if needed. This document may contain words that you do not  
12 understand. Please feel free to ask the investigator in charge of the study or other  
13 members of the study team to answer your questions and explain any word or  
14 information you do not understand.

15  
16 **NATURE AND PURPOSE OF THE RESEARCH STUDY**

17 To date, no medication has been shown effective in curing chronic subdural hematomas.  
18 The purpose of this study is to determine whether tranexamic acid, compared with a  
19 placebo, could resolve hematomas faster.

20  
21 **CONDUCT OF THE STUDY**

22 Your chronic subdural hematoma could be treated by observation (hematoma left to  
23 disappear by itself) or by surgery; your physician will discuss this with you,  
24 independently from the study. If you agree to participate in the study, in addition to the  
25 treatment you and your doctor choose, you will have to take either tranexamic acid or a  
26 placebo once a day until the hematoma is resolved or for a maximum of 20 weeks if it  
27 persists.

28  
29 Tranexamic acid is a medication frequently used to reduce bleeding in heart surgery, in  
30 gynaecologic and orthopaedic surgeries and in trauma patients. Some reports suggest  
31 that giving tranexamic acid for a few weeks could cure subdural hematomas without  
32 using surgery.

33  
34 Whether you participate or not in the study, as part of the regular follow-up, you will have  
35 to undergo 2 to 5 computerized axial tomographies (CAT-scans). However, if you accept  
36 to participate in the study, one of those CAT-scans will be done with an iodine injection  
37 to evaluate the amount of blood vessels implicated in the hematoma. In addition, you will  
38 have to visit the Research Centre of the CHUS 3 times to meet with the research  
39 personnel. Those visits will be scheduled on the same days as the CAT-scans, to reduce  
40 your amount of travel.

41  
42 The three meetings will be:

- 43 • Screening visit and beginning of treatment  
44 • Follow-up visit  
45 • End of study visit

46  
47 If you must undergo surgery to drain your subdural hematoma, a sample of the  
48 hematoma will be taken and analyzed. That procedure does not modify the surgery  
49 proceedings in any way.

50 **Screening visit and beginning of treatment:**

51 During that visit (about 60 minutes), the research staff will validate your eligibility to  
52 participate in the study. Medical and sociodemographic data will be collected and you  
53 will be given an iodine injection to undergo a CAT-scan. If you are allergic to iodine or if  
54 you have kidney failure, that exam will not be done. You will also have to fill in a  
55 questionnaire to evaluate several aspects of your life, including your self-sufficiency,  
56 your quality of life and your cognitive functions.

57  
58 You will randomly be assigned to one of the following groups:

- 59 • Group 1: Placebo
- 60 • Group 2: Tranexamic acid

61  
62 You have one in two chances to be assigned to either group. Placebo is an inactive  
63 substance that looks like the active medication. Since this study is double-blinded,  
64 neither you nor the study team will know to which treatment group you will belong.  
65 However, in case of an emergency, the study doctor will be able to get that information  
66 quickly.

67  
68 Finally, we will give you the medication and set a follow-up appointment 10 weeks later.

69  
70 **Follow-up Visit:**

71 The follow-up visit (10 week later) will last approximately 30 minutes. You will have to fill  
72 in a few questionnaires again. If the CAT-scan shows that the subdural hematoma is still  
73 there, the treatment will be extended for 10 more weeks and we will give you the  
74 medication you need.

75  
76 **End of Treatment Visit:**

77 When you have definitely stopped taking the study medication, you will visit the  
78 Research Centre for your end-of-treatment visit. That visit will last about 30 minutes  
79 during which you will be asked to fill in some questionnaires with the research staff.

80  
81 The following tests and procedures will be done during your participation in the study:  
82 Please refer to the Study Schedule at the end of this document for a comprehensive  
83 view of the examinations and procedures of the study.

- 84 • Medical history
- 85 • Questionnaires (20 minutes total)
- 86 • Blood draws
- 87 • CAT-scan with injection
- 88 • Follow-up CAT-scans (3 to 5, depending on the evolution of the hematoma)
- 89 • Analysis of the hematoma (if you undergo surgery)

90  
91 Your medical records will be examined all through this research study by the investigator  
92 and his research team. Besides, results of tests, procedures and medical exams done  
93 for research purposes may appear in your medical record.

94  
95

96 **RISKS THAT MAY RESULT FROM YOUR PARTICIPATION IN THIS RESEARCH**  
97 **STUDY**

98 The risks associated with the tranexamic acid intake are the following:

- 99 • Common side-effects (>10%):  
100     ○ Headache  
101     ○ Nausea  
102     ○ Vomiting  
103     ○ Diarrhoea  
104     ○ Muscular or lower-back pain  
105  
106 • Rare side-effects (1-10%):  
107     ○ Fatigue  
108     ○ Anaemia  
109     ○ Joint pain  
110     ○ Muscular cramps  
111  
112 • Very rare side-effects (< 1%):  
113     ○ Allergic reactions (rash)  
114     ○ Occlusion of the central retinal artery and vein  
115     ○ Vision changes (e.g. in visual acuity or visual field and, mainly, changes  
116         in perception of colours)  
117     ○ Dizziness  
118     ○ Seizures or convulsions  
119     ○ Chest or leg pain  
120     ○ Heart attack (chest pain)  
121     ○ Blood clots/ deep venous thrombosis/ arterial thrombosis in a limb (pain,  
122         redness, heat in hands, legs, ankles or feet)  
123     ○ Cerebral infarction/ stroke/ cerebral thrombosis (difficulty talking or  
124         walking, sudden confusion, numbness or sensation of weakness)  
125     ○ Acute necrosis of the renal cortex (difficulty to urinate)  
126     ○ Decreased blood pressure (dizziness, headache and sensation of being  
127         inebriated)

128  
129 If you experience any of those side effects, please reach Dr. Christian Iorio-Morin at the  
130 number written on the first page or go to the Emergency Room and say that you are  
131 participating in a research study.

132  
133 Risks associated with iodine injections are: allergy to the contrast product, and renal  
134 failure.

135  
136 **RISK ASSOCIATED WITH PREGNANCY**

137 Taking part in this research study may include known or unknown risks to pregnant  
138 women, embryos, fetuses, or breastfed infants. Therefore pregnant or breastfeeding  
139 women cannot participate in this study. Women liable to become pregnant must take a  
140 pregnancy test before participating in the study. Furthermore, they absolutely must use a  
141 medically acceptable birth-control method all through their participation in the research  
142 study. The study doctor or the study staff will check your birth control method to make  
143 sure it is medically acceptable. If you think you have become pregnant during the study,  
144 you must inform the study investigator at once to discuss various options.

145  
146 **INCONVENIENCES POSSIBLY RESULTING FROM YOUR PARTICIPATION IN THE**  
147 **RESEARCH STUDY.**

148 The main inconvenience resulting from your participation in the study is the time needed  
149 to fill in the questionnaires.

150  
151 **BENEFITS POSSIBLY RESULTING FROM YOUR PARTICIPATION IN THE**  
152 **RESEARCH STUDY**

153 You may personally benefit from your participation in this research study, but it cannot  
154 be guaranteed. However, the information resulting from this study may help increase our  
155 knowledge about chronic subdural hematomas.

156  
157 **ALTERNATIVES TO YOUR PARTICIPATION IN THIS RESEARCH STUDY**

158 You do not have to participate in this research study to be treated for your condition.  
159 Participation merely adds a medical treatment, the efficiency of which is not  
160 demonstrated.

161  
162 **VOLUNTARY PARTICIPATION TO AND POSSIBLE WITHDRAWAL FROM THE**  
163 **RESEARCH STUDY**

164 Your participation in this research study is voluntary. Thus, you are free to refuse to  
165 participate. You can also withdraw from the study at any time, without providing any  
166 reason, by notifying the investigator in charge of the study or one of his assistants.

167  
168 Your decision not to participate or to withdraw from the study will not have any  
169 consequences on the quality of care and services you are entitled to or on your  
170 relationship with the investigator in charge or other caregivers.

171  
172 We will inform you without delay of any new knowledge acquired during the study  
173 procedures and that could influence your decision to keep on participating.

174  
175 If you withdraw or are withdrawn from the study, your medical information already  
176 collected during the study will be kept as long as necessary to insure patients' safety and  
177 to meet regulatory requirements.

178  
179 **TERMINATION OF STUDY**

180 The study investigator, the funding agency or the Research Ethics Board of the CHUS  
181 could end your participation without your consent at any time for the following reasons:

- 182  
183
- 184 • If new scientific information was made available and showed that it is in your best  
185 interest to stop participating;
  - 186 • If the investigator in charge of the study thinks it is in your best interest;
  - 187 • If you do not follow the study instructions;
  - 188 • If there are administrative reasons to abandon the study.
- 189

190 **CONFIDENTIALITY**

191 While you participate in this research study, the study doctor and his staff will collect and  
192 record information about you in a research file. Only the information needed to meet the  
193 scientific objectives of the study will be collected.

194  
195 This information could include data taken from your medical record concerning your past  
196 and present medical history, your lifestyle and results from all the tests, exams and  
197 procedures you will undergo during the study. Your file could also contain other  
198 information, such as your name, gender, date of birth and ethnic origin.

199  
200 The information collected will be kept strictly confidential to the extent permitted by law.  
201 To protect your identity and confidentiality of your information, you will only be identified  
202 by a code number. The code key linking your identity and your research file will be kept  
203 securely by the study investigator.

204  
205 Your data, combined with data collected from other studies, could be shared with  
206 regulatory agencies from Canada or other countries, or with the study sponsor's  
207 business partners. The investigator in charge will keep the research data for a 25-year  
208 period.

209  
210 In addition, the study data may be used to obtain marketing approval of the study drug  
211 from authorized regulatory agencies. The study data could also be used for other  
212 analyses related to the study or to develop future research studies.

213  
214 The study data may be published in specialized journals or discussed during scientific  
215 meetings, but it will be impossible to identify any participants.

216  
217 To make sure the data collected from your information is accurate, your research and  
218 medical records could be inspected by a person or persons authorized by the Research  
219 Ethics Board of the CHUS or the institution or by representatives of public authorities. All  
220 of these people and groups are bound by confidentiality policies. For safety purposes, in  
221 order to be able to reach you quickly if needed, the study investigator will keep your  
222 name, surname, contact information and dates of your participation in the study in a  
223 separate secured log, for one year after the end of the study.

224  
225 You have the right to examine your study records in order to check the information  
226 collected about you and to correct it, if necessary, for as long as this information is  
227 available from the study investigator or the CHUS. However, in order to maintain the  
228 scientific integrity of the study, some of this information may be made available to you  
229 only once the study has ended.

230  
231

232 **COMPENSATION**

233 You will not be compensated for your participation in this research study.  
234

235 **PARTICIPANTS' RIGHTS AND INDEMNIFICATION IN CASE OF INJURY**

236 If you suffer any harm whatsoever resulting from your participation in this research  
237 study, you will be provided with all the necessary care and services required by your  
238 medical condition, at no cost to you.  
239

240 By agreeing to take part in this study, you do not waive any of your legal rights nor do  
241 you release the investigators or the institution where this research study is being  
242 conducted from their civil and professional responsibilities.  
243

244 **FUNDING OF THE RESEARCH STUDY**

245 The investigator has received money from the funding agency to conduct this research  
246 study.  
247

248 **RESOURCE PERSONS**

249 If you have any question concerning your participation in this study, please refer to the  
250 boxed numbers on page 1.  
251

252 For any question about your rights as a subject participating in this study or if you have  
253 comments or wish to file a complaint, you can contact the Commissioner for Complaints  
254 and Quality Services of the CIUSSS de l'Estrie-CHUS at the following number: 1-866-  
255 917-7903.  
256

257 **MONITORING OF ETHICAL ASPECTS OF THE STUDY**

258 The Research Ethics Board (REB) of the CHUS approved this study and is in charge of  
259 its monitoring. Furthermore, we guarantee that any modification to the study protocol or  
260 to this information and consent form will be submitted to the REB's approval.  
261

262 If you wish to contact a member of the REB, please reach the its Support Services at the  
263 following number: 819-346-1110, ext. 12856.  
264  
265

266 **CONSENT**

267 I declare having read this Information and Consent Form, especially where the nature of  
268 my participation and the extent of the associated risks are concerned. I acknowledge  
269 having received explanations about the study, answers to all my questions and having  
270 been given enough time to make a decision.

271  
272 I freely and voluntarily agree to participate in this research study.

273  
274  
275

---

|                         |                          |      |
|-------------------------|--------------------------|------|
| 276 Name of participant | Signature of participant | Date |
| 277 (please print)      |                          |      |

278  
279  
280

---

|                                                         |                                            |      |
|---------------------------------------------------------|--------------------------------------------|------|
| Name of person who<br>obtains consent<br>(please print) | Signature of person who<br>obtains consent | Date |
|---------------------------------------------------------|--------------------------------------------|------|

281

282 **INVESTIGATOR'S COMMITMENT**

283 I hereby certify that the provisions of this Information and Consent Form were fully  
284 explained to the participant, that his/her questions about the research study were  
285 answered and that the participant was clearly informed that he/she can withdraw from  
286 the study at any time, without prejudice.

287

288 I am committed to honour what has been agreed upon in this Information and Consent  
289 Form and to give a signed copy of it to the participant. I have participated in the  
290 recruitment process of the participant and I confirm that I have informed her/him of my  
291 double role as treating physician and investigator.

292  
293  
294

---

|                          |                           |      |
|--------------------------|---------------------------|------|
| 296 Name of investigator | Signature of investigator | Date |
| 297 (please print)       |                           |      |

298



299 **CONSENT OF REPRESENTATIVE (ADULTS HAVING SUDDENLY BECOME**  
300 **INCAPABLE)**

301  
302 Due to the fact that Mr./Ms. \_\_\_\_\_ has suddenly  
303 become incapable of giving consent for the reason indicated below, the Civil Code of  
304 Quebec authorizes you, as his/her \_\_\_\_\_ (your  
305 relationship with the participant) to give consent for him/her to participate in this research  
306 study.

307 As soon as Mr./Ms \_\_\_\_\_ has recovered enough, we  
308 will invite him/her to sign the consent form in order to indicate whether he/she wants to  
309 continue participating or not in the study.

310

311 **REASON WHY THE PARTICIPANT CANNOT GIVE CONSENT:**

312

313

314

315 By signing this page, I declare having read this Information and Consent Form. I  
316 acknowledge having received explanations about the study, answers to all my questions  
317 and having been given enough time to make a decision. I voluntarily agree to the  
318 participation of \_\_\_\_\_ in this study.

319

320

---

| Name of representative<br>(please print) | Signature of representative | Date |
|------------------------------------------|-----------------------------|------|
|------------------------------------------|-----------------------------|------|

323

324 I explained the representative all pertinent aspects of the research and I have answered  
325 all his/her questions. I have told him/her that participation in the research study is free  
326 and voluntary and that participation can be stopped anytime.

327 I am committed to honour what has been agreed upon in this Information and Consent  
328 Form and to give a signed copy of it to the participant.

329

330

331

---

| Name of person who<br>obtains consent<br>(please print) | Signature of person who<br>obtains consent | Date |
|---------------------------------------------------------|--------------------------------------------|------|
|---------------------------------------------------------|--------------------------------------------|------|

332

333

334 **CONSENT OF REPRESENTATIVE (FOR INCAPABLE ADULTS)**

335  
336 Due to the fact that Mr./Ms. \_\_\_\_\_ is incapable of giving  
337 consent for the reason indicated below, as his/her legal representative you must sign  
338 this page in order for the patient to participate in this research study.

339  
340 **REASON WHY THE PARTICIPANT CANNOT GIVE CONSENT:**

341  
342  
343  
344 Verbal agreement of the participant able to understand the nature of the project:

345  
346 Yes: \_\_\_ No: \_\_\_ N/A: \_\_\_ (for the participant incapable of understanding the  
347 nature of the project)

348  
349

---

|                                       |                                                     |      |
|---------------------------------------|-----------------------------------------------------|------|
| Name of participant<br>(please print) | Signature of participant<br>(if capable of signing) | Date |
|---------------------------------------|-----------------------------------------------------|------|

350  
351

---

|                                                |                     |      |
|------------------------------------------------|---------------------|------|
| Name of legal representative<br>(please print) | Signature and title | Date |
|------------------------------------------------|---------------------|------|

352  
353  
354  
355 I explained the representative all pertinent aspects of the research and I have answered  
356 all his/her questions. I have told him/her that participation in the research study is free  
357 and voluntary and that participation can be stopped anytime. I am committed to honour  
358 what has been agreed upon in this Information and Consent Form and to give a signed  
359 copy thereof to the participant's representative.

360  
361

---

|                                                       |                                          |      |
|-------------------------------------------------------|------------------------------------------|------|
| Name of person<br>obtaining consent<br>(please print) | Signature of person<br>obtaining consent | Date |
|-------------------------------------------------------|------------------------------------------|------|

**SCHEDULE OF STUDY VISITS AND PROCEDURES**

| Visit #                                  | Screening Visit |   |   | Follow-up Visit |           |           | End-of-treatment Visit |
|------------------------------------------|-----------------|---|---|-----------------|-----------|-----------|------------------------|
| Treatment Week                           | -2 to 0         | 1 | 5 | 10              | 15        | 20        | End + 12               |
| Visit length (minutes)                   | 60              |   |   | 30              |           |           | 30                     |
| Consent                                  | X               |   |   |                 |           |           |                        |
| Medical questionnaire                    | X               |   |   |                 |           |           |                        |
| Questionnaires                           | X               |   |   | X               |           |           | X                      |
| Blood draws                              | X               |   |   |                 |           |           |                        |
| Computerized axial tomography (CAT-Scan) | X               |   | X | If needed       | If needed | If needed | X                      |
| CAT-Scan with injection                  |                 | X |   |                 |           |           |                        |
| Hematoma analysis                        |                 |   |   | If needed       |           |           |                        |
| Medication monitoring                    |                 |   |   | Continuing      |           |           |                        |
| Monitoring of side-effects               |                 |   |   | Continuing      |           |           |                        |
