# Supplementary material for: Tranexamic Acid in Chronic Subdural Hematomas (TRACS): study protocol for a randomized controlled trial
Source: Springer Nature journal article supplement (doi:10.1186/s13063-016-1358-5), 2016-05-05
Supplement: MOESM5 [file 10111858]

## L'acide tranexamique comme traitement médical des hématomes sous-duraux chroniques

### Questionnaire initial

#### Identification

|                  |                                                                  |                     |       |
|------------------|------------------------------------------------------------------|---------------------|-------|
| No sujet         | _____                                                            | No dossier          | _____ |
| Nom              | _____                                                            | Prénom              | _____ |
| Sexe             | <input type="checkbox"/> Femme<br><input type="checkbox"/> Homme | Date de naissance   | _____ |
| Centre recruteur | _____                                                            | Date du recrutement | _____ |

#### Caractéristiques de base

|                                                   |                                                                                                                  |
|---------------------------------------------------|------------------------------------------------------------------------------------------------------------------|
| Dominance                                         | <input type="checkbox"/> Droitier<br><input type="checkbox"/> Gaucher<br><input type="checkbox"/> Ambidextre     |
| Consommation d'alcool<br>(nombre par semaine)     | _____                                                                                                            |
| Tabagisme actif                                   | <input type="checkbox"/> Non<br><input type="checkbox"/> Oui                                                     |
| Tabagisme cumulatif<br>(nombre de paquets-années) | _____                                                                                                            |
| Antécédent d'hématome sous-dural                  | <input type="checkbox"/> Non<br><input type="checkbox"/> Oui, non-drainé<br><input type="checkbox"/> Oui, drainé |

Prise récente (moins de 1 mois) d'un médicament  
antiplaquettaire  Non  
 Oui : \_\_\_\_\_

Prise récente (moins de 1 mois) d'un médicament  
anticoagulant  Non  
 Oui : \_\_\_\_\_

Prise récente (moins de 1 mois) d'IECA ou D'ARA  Non  
 Oui : \_\_\_\_\_

Prise récente (moins de 1 mois) de corticostéroïde  Non  
 Oui

Convulsion dans la dernière année (nombre) \_\_\_\_\_

Dérivation de LCR dans la dernière année  Non  
 Oui, ponction lombaire  
 Oui, dérivation ventriculo-péritonéale  
 Oui, autre : \_\_\_\_\_

Antécédent de procédure neurochirurgicale récente  
(moins de 1 mois avant le début des symptômes)  Non  
 Oui, procédure extra-crânienne  
 Oui, procédure intra-crânienne

Histoire de traumatisme récent  
(moins de 1 mois avant le début des symptômes)  Non  
 Oui, mineur (pas de diagnostic)  
 Oui, majeur (TCC léger ou pire diagnostiqué par un MD)

Tout autre facteur de risque d'hématome sous-dural  
chronique jugé pertinent \_\_\_\_\_

## Présentation clinique

|                                                                                |                                                                                                                                                                                                                                                                                                                                                                                                                                                                                                                                          |
|--------------------------------------------------------------------------------|------------------------------------------------------------------------------------------------------------------------------------------------------------------------------------------------------------------------------------------------------------------------------------------------------------------------------------------------------------------------------------------------------------------------------------------------------------------------------------------------------------------------------------------|
| Contexte de la consultation                                                    | <input type="checkbox"/> Consultation électorique en clinique externe<br><input type="checkbox"/> Consultation non-urgente à l'urgence ou sur un étage<br><input type="checkbox"/> Consultation urgente                                                                                                                                                                                                                                                                                                                                  |
| Symptôme <b>principal</b> à la présentation<br>(ne cocher qu'un seul symptôme) | <input type="checkbox"/> Asymptomatique<br><input type="checkbox"/> Céphalées<br><input type="checkbox"/> Confusion<br><input type="checkbox"/> Somnolence<br><input type="checkbox"/> Chute ou trouble d'équilibre<br><input type="checkbox"/> Faiblesse d'un membre<br><input type="checkbox"/> Trouble du langage<br><input type="checkbox"/> Trouble de mémoire<br><input type="checkbox"/> Nausées/Vomissements<br><input type="checkbox"/> Trouble visuel<br><input type="checkbox"/> Convulsion<br><input type="checkbox"/> Autre |
| Date du début approximatif des symptômes                                       | _____                                                                                                                                                                                                                                                                                                                                                                                                                                                                                                                                    |
| Score MMSE au recrutement                                                      | _____                                                                                                                                                                                                                                                                                                                                                                                                                                                                                                                                    |
| Score mBI au recrutement                                                       | _____                                                                                                                                                                                                                                                                                                                                                                                                                                                                                                                                    |
| Score EQ-5D détaillé (XXXXX) au recrutement                                    | _____                                                                                                                                                                                                                                                                                                                                                                                                                                                                                                                                    |
| Score EQ-5D VAS au recrutement                                                 | _____                                                                                                                                                                                                                                                                                                                                                                                                                                                                                                                                    |
| Plan initial de traitement                                                     | <input type="checkbox"/> Conservateur<br><input type="checkbox"/> Drainage électif<br><input type="checkbox"/> Drainage urgent (ne pouvant pas attendre au lendemain)                                                                                                                                                                                                                                                                                                                                                                    |

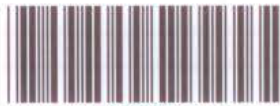

DT9088

Nom de l'établissement \_\_\_\_\_

| A) Orientation                                                                                                                                                                                                                                                                                                                                                                                                                                                                                                                                                                                                                                                                                                                                                                                                                                                                                                                                                                                                                                            | COTE<br>MAXIMALE                                                                                      | COTE<br>DU SUJET |                       |                                       |          |     |    |   |   |   |         |         |         |                       |  |  |  |  |  |  |          |     |
|-----------------------------------------------------------------------------------------------------------------------------------------------------------------------------------------------------------------------------------------------------------------------------------------------------------------------------------------------------------------------------------------------------------------------------------------------------------------------------------------------------------------------------------------------------------------------------------------------------------------------------------------------------------------------------------------------------------------------------------------------------------------------------------------------------------------------------------------------------------------------------------------------------------------------------------------------------------------------------------------------------------------------------------------------------------|-------------------------------------------------------------------------------------------------------|------------------|-----------------------|---------------------------------------|----------|-----|----|---|---|---|---------|---------|---------|-----------------------|--|--|--|--|--|--|----------|-----|
| Demander au sujet :                                                                                                                                                                                                                                                                                                                                                                                                                                                                                                                                                                                                                                                                                                                                                                                                                                                                                                                                                                                                                                       |                                                                                                       |                  |                       |                                       |          |     |    |   |   |   |         |         |         |                       |  |  |  |  |  |  |          |     |
| <b>1- Quel est</b> { <table style="display: inline-table; vertical-align: middle; margin-left: 10px;"> <tr> <td style="border: 1px solid black; width: 40px; height: 20px; text-align: center;"> _ _ _ _ </td> <td style="border: 1px solid black; width: 40px; height: 20px; text-align: center;"> _ _ </td> <td style="border: 1px solid black; width: 40px; height: 20px; text-align: center;"> _ _ </td> <td style="padding: 0 5px;">D</td> <td style="padding: 0 5px;">L</td> <td style="padding: 0 5px;">M</td> <td style="padding: 0 5px;">Me</td> <td style="padding: 0 5px;">J</td> <td style="padding: 0 5px;">V</td> <td style="padding: 0 5px;">S</td> </tr> <tr> <td style="text-align: center;">l'année</td> <td style="text-align: center;">le mois</td> <td style="text-align: center;">le jour</td> <td colspan="7" style="text-align: center;">le jour de la semaine</td> </tr> </table><br>La saison : printemps <input type="checkbox"/> été <input type="checkbox"/> automne <input type="checkbox"/> hiver <input type="checkbox"/> | _ _ _ _                                                                                               | _ _              | _ _                   | D                                     | L        | M   | Me | J | V | S | l'année | le mois | le jour | le jour de la semaine |  |  |  |  |  |  | <b>5</b> | ( ) |
| _ _ _ _                                                                                                                                                                                                                                                                                                                                                                                                                                                                                                                                                                                                                                                                                                                                                                                                                                                                                                                                                                                                                                                   | _ _                                                                                                   | _ _              | D                     | L                                     | M        | Me  | J  | V | S |   |         |         |         |                       |  |  |  |  |  |  |          |     |
| l'année                                                                                                                                                                                                                                                                                                                                                                                                                                                                                                                                                                                                                                                                                                                                                                                                                                                                                                                                                                                                                                                   | le mois                                                                                               | le jour          | le jour de la semaine |                                       |          |     |    |   |   |   |         |         |         |                       |  |  |  |  |  |  |          |     |
| <b>2- Où sommes-nous</b> { <table style="display: inline-table; vertical-align: middle; margin-left: 10px;"> <tr> <td style="border: 1px solid black; width: 250px; height: 20px; text-align: center;">Province</td> <td style="border: 1px solid black; width: 250px; height: 20px; text-align: center;">Pays</td> </tr> <tr> <td style="border: 1px solid black; width: 250px; height: 20px; text-align: center;">Ville, village</td> <td style="border: 1px solid black; width: 250px; height: 20px; text-align: center;">Lieu (hôpital, cabinet, maison, etc.)</td> </tr> </table><br>Étage <input style="width: 40px; height: 20px;" type="text"/>                                                                                                                                                                                                                                                                                                                                                                                                   | Province                                                                                              | Pays             | Ville, village        | Lieu (hôpital, cabinet, maison, etc.) | <b>5</b> | ( ) |    |   |   |   |         |         |         |                       |  |  |  |  |  |  |          |     |
| Province                                                                                                                                                                                                                                                                                                                                                                                                                                                                                                                                                                                                                                                                                                                                                                                                                                                                                                                                                                                                                                                  | Pays                                                                                                  |                  |                       |                                       |          |     |    |   |   |   |         |         |         |                       |  |  |  |  |  |  |          |     |
| Ville, village                                                                                                                                                                                                                                                                                                                                                                                                                                                                                                                                                                                                                                                                                                                                                                                                                                                                                                                                                                                                                                            | Lieu (hôpital, cabinet, maison, etc.)                                                                 |                  |                       |                                       |          |     |    |   |   |   |         |         |         |                       |  |  |  |  |  |  |          |     |
| <b>B) Enregistrement</b>                                                                                                                                                                                                                                                                                                                                                                                                                                                                                                                                                                                                                                                                                                                                                                                                                                                                                                                                                                                                                                  |                                                                                                       |                  |                       |                                       |          |     |    |   |   |   |         |         |         |                       |  |  |  |  |  |  |          |     |
| <b>3- Mentionner un des groupes de 3 mots suivants; prendre une seconde pour prononcer chaque mot :</b>                                                                                                                                                                                                                                                                                                                                                                                                                                                                                                                                                                                                                                                                                                                                                                                                                                                                                                                                                   |                                                                                                       |                  |                       |                                       |          |     |    |   |   |   |         |         |         |                       |  |  |  |  |  |  |          |     |
|                                                                                                                                                                                                                                                                                                                                                                                                                                                                                                                                                                                                                                                                                                                                                                                                                                                                                                                                                                                                                                                           | chemise, bleu, honnêteté ( )                                                                          | <b>3</b> ( )     |                       |                                       |          |     |    |   |   |   |         |         |         |                       |  |  |  |  |  |  |          |     |
|                                                                                                                                                                                                                                                                                                                                                                                                                                                                                                                                                                                                                                                                                                                                                                                                                                                                                                                                                                                                                                                           | ou                                                                                                    |                  |                       |                                       |          |     |    |   |   |   |         |         |         |                       |  |  |  |  |  |  |          |     |
|                                                                                                                                                                                                                                                                                                                                                                                                                                                                                                                                                                                                                                                                                                                                                                                                                                                                                                                                                                                                                                                           | chaussure, brun, modestie ( )                                                                         |                  |                       |                                       |          |     |    |   |   |   |         |         |         |                       |  |  |  |  |  |  |          |     |
|                                                                                                                                                                                                                                                                                                                                                                                                                                                                                                                                                                                                                                                                                                                                                                                                                                                                                                                                                                                                                                                           | ou<br>chandail, blanc, charité ( )                                                                    |                  |                       |                                       |          |     |    |   |   |   |         |         |         |                       |  |  |  |  |  |  |          |     |
| Par la suite, demander au sujet de répéter les 3 mots choisis.<br>Donner 1 point pour chaque bonne réponse au 1 <sup>er</sup> essai. Répéter l'exercice jusqu'à ce que le sujet retienne les 3 mots.<br>Compter le nombre d'essais et le noter. Pour information seulement.                                                                                                                                                                                                                                                                                                                                                                                                                                                                                                                                                                                                                                                                                                                                                                               |                                                                                                       |                  |                       |                                       |          |     |    |   |   |   |         |         |         |                       |  |  |  |  |  |  |          |     |
| Nombre d'essais : _____                                                                                                                                                                                                                                                                                                                                                                                                                                                                                                                                                                                                                                                                                                                                                                                                                                                                                                                                                                                                                                   |                                                                                                       |                  |                       |                                       |          |     |    |   |   |   |         |         |         |                       |  |  |  |  |  |  |          |     |
| <b>C) Attention et calcul (cocher l'un ou l'autre test)</b>                                                                                                                                                                                                                                                                                                                                                                                                                                                                                                                                                                                                                                                                                                                                                                                                                                                                                                                                                                                               |                                                                                                       |                  |                       |                                       |          |     |    |   |   |   |         |         |         |                       |  |  |  |  |  |  |          |     |
| <b>4- <input type="checkbox"/> Demander au sujet de faire la soustraction par intervalles de 7 à partir de 100 :</b>                                                                                                                                                                                                                                                                                                                                                                                                                                                                                                                                                                                                                                                                                                                                                                                                                                                                                                                                      | $100 - 7 = ( ) \quad 93 - 7 = ( ) \quad 86 - 7 = ( ) \quad 79 - 7 = ( ) \quad 72 - 7 = ( ) \quad 65.$ |                  |                       |                                       |          |     |    |   |   |   |         |         |         |                       |  |  |  |  |  |  |          |     |
| <b>OU</b>                                                                                                                                                                                                                                                                                                                                                                                                                                                                                                                                                                                                                                                                                                                                                                                                                                                                                                                                                                                                                                                 | Donner 1 point pour chaque bonne réponse.                                                             |                  |                       |                                       |          |     |    |   |   |   |         |         |         |                       |  |  |  |  |  |  |          |     |
| <input type="checkbox"/> Demander au sujet d'épeler le mot « MONDE » à l'envers. (EDNOM) : _____                                                                                                                                                                                                                                                                                                                                                                                                                                                                                                                                                                                                                                                                                                                                                                                                                                                                                                                                                          | (écrire les lettres)                                                                                  |                  |                       |                                       |          |     |    |   |   |   |         |         |         |                       |  |  |  |  |  |  |          |     |
| <b>5</b>                                                                                                                                                                                                                                                                                                                                                                                                                                                                                                                                                                                                                                                                                                                                                                                                                                                                                                                                                                                                                                                  | ( )                                                                                                   |                  |                       |                                       |          |     |    |   |   |   |         |         |         |                       |  |  |  |  |  |  |          |     |
| <b>D) Rétention mnésique</b>                                                                                                                                                                                                                                                                                                                                                                                                                                                                                                                                                                                                                                                                                                                                                                                                                                                                                                                                                                                                                              |                                                                                                       |                  |                       |                                       |          |     |    |   |   |   |         |         |         |                       |  |  |  |  |  |  |          |     |
| <b>5- Demander au sujet de répéter les 3 mots déjà mentionnés :</b>                                                                                                                                                                                                                                                                                                                                                                                                                                                                                                                                                                                                                                                                                                                                                                                                                                                                                                                                                                                       | chemise, bleu, honnêteté ( )                                                                          | <b>3</b> ( )     |                       |                                       |          |     |    |   |   |   |         |         |         |                       |  |  |  |  |  |  |          |     |
|                                                                                                                                                                                                                                                                                                                                                                                                                                                                                                                                                                                                                                                                                                                                                                                                                                                                                                                                                                                                                                                           | ou                                                                                                    |                  |                       |                                       |          |     |    |   |   |   |         |         |         |                       |  |  |  |  |  |  |          |     |
|                                                                                                                                                                                                                                                                                                                                                                                                                                                                                                                                                                                                                                                                                                                                                                                                                                                                                                                                                                                                                                                           | chaussure, brun, modestie ( )                                                                         |                  |                       |                                       |          |     |    |   |   |   |         |         |         |                       |  |  |  |  |  |  |          |     |
|                                                                                                                                                                                                                                                                                                                                                                                                                                                                                                                                                                                                                                                                                                                                                                                                                                                                                                                                                                                                                                                           | ou<br>chandail, blanc, charité ( )                                                                    |                  |                       |                                       |          |     |    |   |   |   |         |         |         |                       |  |  |  |  |  |  |          |     |
| <b>E) Langage</b>                                                                                                                                                                                                                                                                                                                                                                                                                                                                                                                                                                                                                                                                                                                                                                                                                                                                                                                                                                                                                                         |                                                                                                       |                  |                       |                                       |          |     |    |   |   |   |         |         |         |                       |  |  |  |  |  |  |          |     |
| <b>6- Montrer au sujet un crayon ( ) une montre ( ) et lui demander de nommer l'objet.</b>                                                                                                                                                                                                                                                                                                                                                                                                                                                                                                                                                                                                                                                                                                                                                                                                                                                                                                                                                                | <b>2</b>                                                                                              | ( )              |                       |                                       |          |     |    |   |   |   |         |         |         |                       |  |  |  |  |  |  |          |     |
| <b>7- Demander au sujet de répéter la phrase suivante : « Pas de si ni de mais ».</b>                                                                                                                                                                                                                                                                                                                                                                                                                                                                                                                                                                                                                                                                                                                                                                                                                                                                                                                                                                     | <b>1</b>                                                                                              | ( )              |                       |                                       |          |     |    |   |   |   |         |         |         |                       |  |  |  |  |  |  |          |     |
| <b>8- Demander au sujet d'obéir à un ordre en 3 temps : « Prenez ce papier de la main droite ou gauche, pliez-le en deux et redonnez-le moi ».</b>                                                                                                                                                                                                                                                                                                                                                                                                                                                                                                                                                                                                                                                                                                                                                                                                                                                                                                        | <b>3</b>                                                                                              | ( )              |                       |                                       |          |     |    |   |   |   |         |         |         |                       |  |  |  |  |  |  |          |     |
| <b>N.B. :</b> Demander au sujet droitier de prendre de la main gauche et vice versa.<br>Prendre garde de tendre la main; éviter les indices non-verbaux.                                                                                                                                                                                                                                                                                                                                                                                                                                                                                                                                                                                                                                                                                                                                                                                                                                                                                                  |                                                                                                       |                  |                       |                                       |          |     |    |   |   |   |         |         |         |                       |  |  |  |  |  |  |          |     |

Traduction et adaptation française non validées du « Mini-Mental State » de Folstein, M.F., Folstein, S.E., Mc Hugh, P.R. : « Mini-Mental State : A practical method for grading the cognitive state of patients for the clinician ». J. Psychiatr Res, 12 : 189-198, 1975, à partir des travaux du centre de gériatrie Hôpital d'Youville Sherbrooke de Québec.

**E) Langage (suite)**

9- Demander au sujet de lire et de suivre l'instruction suivante :

**« FERMEZ VOS YEUX »**

COTE MAXIMALE COTE DU SUJET

1 ( )

10- Demander au sujet d'écrire une phrase :

1 ( )

(sujet, verbe, sans égard aux fautes)

**F) Praxie de construction**

11- Demander au sujet de copier le dessin suivant :

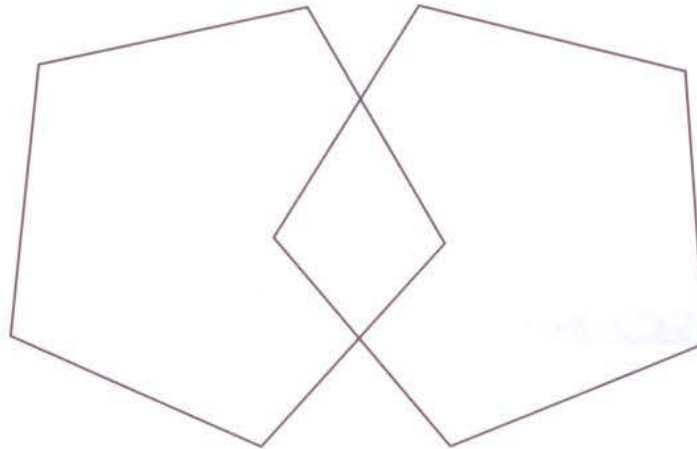

1 ( )

COTE MAXIMALE : 30

COTE DU SUJET : \_\_\_\_\_

**Interprétation des scores :**

Un score de moins de 24 points à l'examen de Folstein sur l'état mental détermine une altération des fonctions cognitives. Ce test ne permet cependant pas de faire un diagnostic étiologique.

Nombre d'années de scolarité du sujet : \_\_\_\_\_ Évaluer le niveau de conscience du sujet : vigilant  somnolent

En cas d'incapacité du sujet à être évalué, spécifier : \_\_\_\_\_

Indiquer les conditions ayant pu influencer l'évaluation \_\_\_\_\_

Date | \_\_\_\_\_ |  
Année Mois Jour

Signature \_\_\_\_\_

Pour chaque rubrique, veuillez cocher UNE case, celle qui décrit le mieux votre santé AUJOURD'HUI.

### **MOBILITÉ**

- Je n'ai aucun problème pour me déplacer à pied
- J'ai des problèmes légers pour me déplacer à pied
- J'ai des problèmes modérés pour me déplacer à pied
- J'ai des problèmes sévères pour me déplacer à pied
- Je suis incapable de me déplacer à pied

### **AUTONOMIE DE LA PERSONNE**

- Je n'ai aucun problème pour me laver ou m'habiller tout(e) seul(e)
- J'ai des problèmes légers pour me laver ou m'habiller tout(e) seul(e)
- J'ai des problèmes modérés pour me laver ou m'habiller tout(e) seul(e)
- J'ai des problèmes sévères pour me laver ou m'habiller tout(e) seul(e)
- Je suis incapable de me laver ou de m'habiller tout(e) seul(e)

### **ACTIVITÉS COURANTES** (*exemples: travail, études, travaux domestiques, activités familiales ou loisirs*)

- Je n'ai aucun problème pour accomplir mes activités courantes
- J'ai des problèmes légers pour accomplir mes activités courantes
- J'ai des problèmes modérés pour accomplir mes activités courantes
- J'ai des problèmes sévères pour accomplir mes activités courantes
- Je suis incapable d'accomplir mes activités courantes

### **DOULEURS / INCONFORT**

- Je n'ai ni douleur ni inconfort
- J'ai des douleurs ou un inconfort léger(ères)
- J'ai des douleurs ou un inconfort modéré(es)
- J'ai des douleurs ou un inconfort sévère(s)
- J'ai des douleurs ou un inconfort extrême(s)

### **ANXIÉTÉ / DÉPRESSION**

- Je ne suis ni anxieux(se) ni déprimé(e)
- Je suis légèrement anxieux(se) ou déprimé(e)
- Je suis modérément anxieux(se) ou déprimé(e)
- Je suis sévèrement anxieux(se) ou déprimé(e)
- Je suis extrêmement anxieux(se) ou déprimé(e)

- Nous aimerions savoir dans quelle mesure votre santé est bonne ou mauvaise AUJOURD’HUI.
- Cette échelle est numérotée de 0 à 100.
- 100 correspond à la meilleure santé que vous puissiez imaginer. 0 correspond à la pire santé que vous puissiez imaginer.
- Veuillez faire un X sur l’échelle afin d’indiquer votre état de santé AUJOURD’HUI.
- Maintenant, veuillez noter dans la case ci-dessous le chiffre que vous avez coché sur l’échelle.

VOTRE SANTÉ AUJOURD’HUI =

Date: \_\_\_\_\_

La meilleure  
santé que vous  
puissiez imaginer

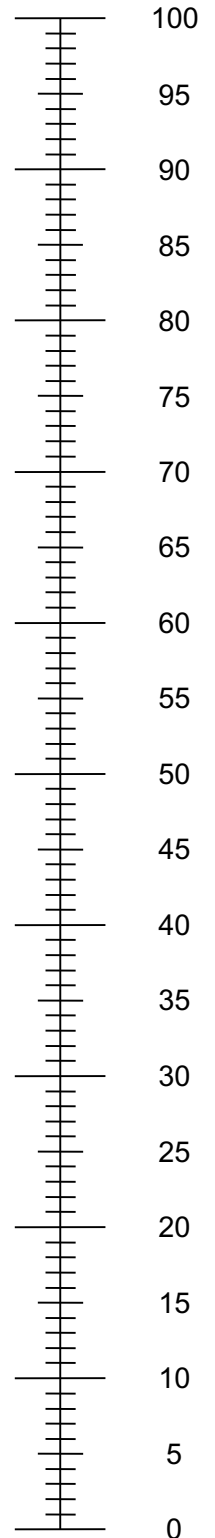

La pire santé que  
vous puissiez  
imaginer

Under each heading, please tick the ONE box that best describes your health TODAY.

**MOBILITY**

- I have no problems in walking about
- I have slight problems in walking about
- I have moderate problems in walking about
- I have severe problems in walking about
- I am unable to walk about

**SELF-CARE**

- I have no problems washing or dressing myself
- I have slight problems washing or dressing myself
- I have moderate problems washing or dressing myself
- I have severe problems washing or dressing myself
- I am unable to wash or dress myself

**USUAL ACTIVITIES** (*e.g. work, study, housework, family or leisure activities*)

- I have no problems doing my usual activities
- I have slight problems doing my usual activities
- I have moderate problems doing my usual activities
- I have severe problems doing my usual activities
- I am unable to do my usual activities

**PAIN / DISCOMFORT**

- I have no pain or discomfort
- I have slight pain or discomfort
- I have moderate pain or discomfort
- I have severe pain or discomfort
- I have extreme pain or discomfort

**ANXIETY / DEPRESSION**

- I am not anxious or depressed
- I am slightly anxious or depressed
- I am moderately anxious or depressed
- I am severely anxious or depressed
- I am extremely anxious or depressed



- We would like to know how good or bad your health is TODAY.
- This scale is numbered from 0 to 100.
- 100 means the best health you can imagine.  
0 means the worst health you can imagine.
- Mark an X on the scale to indicate how your health is TODAY.
- Now, please write the number you marked on the scale in the box below.

YOUR HEALTH TODAY =

Date: \_\_\_\_\_

The best health  
you can imagine

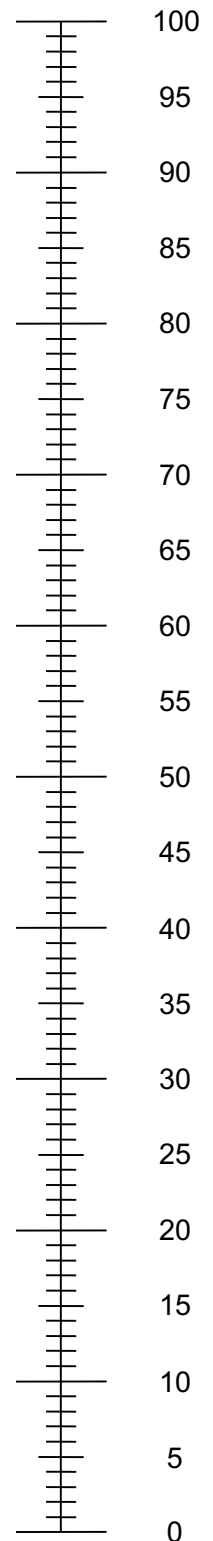

The worst health  
you can imagine

## Modified Barthel Index

### Grille d'évaluation

No sujet \_\_\_\_\_ Date d'administration \_\_\_\_\_

|                                                          | 1         | 2                           | 3                         | 4                          | 5        |
|----------------------------------------------------------|-----------|-----------------------------|---------------------------|----------------------------|----------|
|                                                          | Incapable | Tentatives non-sécuritaires | Réussit avec aide modérée | Réussit avec aide minimale | Autonome |
| Hygiène du visage (dents, barbe)                         | 0         | 1                           | 3                         | 4                          | 5        |
| Prendre son bain                                         | 0         | 1                           | 3                         | 4                          | 5        |
| Aller à la toilette                                      | 0         | 2                           | 5                         | 8                          | 10       |
| Continence urinaire                                      | 0         | 2                           | 5                         | 8                          | 10       |
| Continence fécale                                        | 0         | 2                           | 5                         | 8                          | 10       |
| S'alimenter                                              | 0         | 2                           | 5                         | 8                          | 10       |
| S'habiller                                               | 0         | 2                           | 5                         | 8                          | 10       |
| Monter des escaliers                                     | 0         | 2                           | 5                         | 8                          | 10       |
| Marcher                                                  | 0         | 3                           | 8                         | 12                         | 15       |
| Se déplacer en chaise roulante (si incapable de marcher) | 0         | 1                           | 3                         | 4                          | 5        |
| Transférer au lit                                        | 0         | 3                           | 8                         | 12                         | 15       |

**Total : \_\_\_\_\_ / 100**

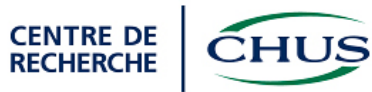

## ÉTUDE TRACS – 14-213

### L'acide tranexamique comme traitement médical des hématomes sous-duraux chroniques

# Protocole opératoire

No sujet \_\_\_\_\_

### Procédure réalisée à DROITE

|                              |                                                                                                                                                                                                           |
|------------------------------|-----------------------------------------------------------------------------------------------------------------------------------------------------------------------------------------------------------|
| Contexte de la chirurgie     | <input type="checkbox"/> Aucune chirurgie effectuée à droite<br><input type="checkbox"/> Chirurgie électorive<br><input type="checkbox"/> Chirurgie d'urgence (qui n'aurait pas pu attendre au lendemain) |
| Date de la chirurgie         | _____                                                                                                                                                                                                     |
| Type de chirurgie            | <input type="checkbox"/> Trépanation simple à droite<br><input type="checkbox"/> Trépanation double à droite<br><input type="checkbox"/> Craniotomie droite<br><input type="checkbox"/> Autre : _____     |
| Lieu de la chirurgie         | <input type="checkbox"/> Bloc opératoire<br><input type="checkbox"/> Drainage au chevet                                                                                                                   |
| Installation de drain        | <input type="checkbox"/> Non<br><input type="checkbox"/> Oui, drain sous-dural droit<br><input type="checkbox"/> Oui, drain sous-galéal droit<br><input type="checkbox"/> Oui, autre : _____              |
| Orientation du drain         | <input type="checkbox"/> Aucun drain<br><input type="checkbox"/> Extrémité en antérieur<br><input type="checkbox"/> Extrémité en postérieur                                                               |
| Irrigation intra-opératoire  | <input type="checkbox"/> Non<br><input type="checkbox"/> Oui                                                                                                                                              |
| Mobilisation post-opératoire | <input type="checkbox"/> Repos au lit<br><input type="checkbox"/> Mobilisation selon tolérance                                                                                                            |

## Procédure réalisée à GAUCHE

|                              |                                                                                                                                                                                                           |
|------------------------------|-----------------------------------------------------------------------------------------------------------------------------------------------------------------------------------------------------------|
| Contexte de la chirurgie     | <input type="checkbox"/> Aucune chirurgie effectuée à gauche<br><input type="checkbox"/> Chirurgie électorive<br><input type="checkbox"/> Chirurgie d'urgence (qui n'aurait pas pu attendre au lendemain) |
| Date de la chirurgie         | _____                                                                                                                                                                                                     |
| Type de chirurgie            | <input type="checkbox"/> Trépanation simple à gauche<br><input type="checkbox"/> Trépanation double à gauche<br><input type="checkbox"/> Craniotomie gauche<br><input type="checkbox"/> Autre : _____     |
| Lieu de la chirurgie         | <input type="checkbox"/> Bloc opératoire<br><input type="checkbox"/> Drainage au chevet                                                                                                                   |
| Installation de drain        | <input type="checkbox"/> Non<br><input type="checkbox"/> Oui, drain sous-dural gauche<br><input type="checkbox"/> Oui, drain sous-galéal gauche<br><input type="checkbox"/> Oui, autre : _____            |
| Orientation du drain         | <input type="checkbox"/> Aucun drain<br><input type="checkbox"/> Extrémité en antérieur<br><input type="checkbox"/> Extrémité en postérieur                                                               |
| Irrigation intra-opératoire  | <input type="checkbox"/> Non<br><input type="checkbox"/> Oui                                                                                                                                              |
| Mobilisation post-opératoire | <input type="checkbox"/> Repos au lit<br><input type="checkbox"/> Mobilisation selon tolérance                                                                                                            |

Signature \_\_\_\_\_

Date \_\_\_\_\_

## Questionnaire de suivi

No sujet \_\_\_\_\_

|                                |                                                                                                                 |
|--------------------------------|-----------------------------------------------------------------------------------------------------------------|
| Résolution du symptôme initial | <input type="checkbox"/> Non<br><input type="checkbox"/> Partiellement<br><input type="checkbox"/> Complètement |
|--------------------------------|-----------------------------------------------------------------------------------------------------------------|

|                                              |                                                                                     |
|----------------------------------------------|-------------------------------------------------------------------------------------|
| Usage de stéroïdes depuis la dernière visite | <input type="checkbox"/> Non<br><input type="checkbox"/> Oui : dose + dates : _____ |
|----------------------------------------------|-------------------------------------------------------------------------------------|

|                                                     |                                                                                      |
|-----------------------------------------------------|--------------------------------------------------------------------------------------|
| Usage d'antiplaquettaires depuis la dernière visite | <input type="checkbox"/> Non<br><input type="checkbox"/> Oui : doses + dates : _____ |
|-----------------------------------------------------|--------------------------------------------------------------------------------------|

|            |       |
|------------|-------|
| Score MMSE | _____ |
|------------|-------|

|           |       |
|-----------|-------|
| Score mBI | _____ |
|-----------|-------|

|                              |       |
|------------------------------|-------|
| Score EQ-5D (détaillé + VAS) | _____ |
|------------------------------|-------|

|                                             |       |
|---------------------------------------------|-------|
| Score GOSE (uniquement pour le suivi final) | _____ |
|---------------------------------------------|-------|

### Surveillance évènements indésirables

|                                                |                                                                                                                                                  |
|------------------------------------------------|--------------------------------------------------------------------------------------------------------------------------------------------------|
| Drainage chirurgical depuis la dernière visite | <input type="checkbox"/> Non<br><input type="checkbox"/> Oui, planifié, date : _____<br><input type="checkbox"/> Oui, non-planifié, date : _____ |
|------------------------------------------------|--------------------------------------------------------------------------------------------------------------------------------------------------|

|                                                         |                                                                            |
|---------------------------------------------------------|----------------------------------------------------------------------------|
| Thrombophlébite diagnostiquée depuis la dernière visite | <input type="checkbox"/> Non<br><input type="checkbox"/> Oui, date : _____ |
|---------------------------------------------------------|----------------------------------------------------------------------------|

|                                                            |                                                                            |
|------------------------------------------------------------|----------------------------------------------------------------------------|
| Embolie pulmonaire diagnostiquée depuis la dernière visite | <input type="checkbox"/> Non<br><input type="checkbox"/> Oui, date : _____ |
|------------------------------------------------------------|----------------------------------------------------------------------------|

|                                             |                                                                            |
|---------------------------------------------|----------------------------------------------------------------------------|
| ICT diagnostiquée depuis la dernière visite | <input type="checkbox"/> Non<br><input type="checkbox"/> Oui, date : _____ |
|---------------------------------------------|----------------------------------------------------------------------------|

|                                             |                                                                            |
|---------------------------------------------|----------------------------------------------------------------------------|
| AVC diagnostiquée depuis la dernière visite | <input type="checkbox"/> Non<br><input type="checkbox"/> Oui, date : _____ |
|---------------------------------------------|----------------------------------------------------------------------------|

|                                                               |                                                                            |
|---------------------------------------------------------------|----------------------------------------------------------------------------|
| Pseudo-néphrolithiase diagnostiquée depuis la dernière visite | <input type="checkbox"/> Non<br><input type="checkbox"/> Oui, date : _____ |
|---------------------------------------------------------------|----------------------------------------------------------------------------|

|                                                   |                                                                                       |
|---------------------------------------------------|---------------------------------------------------------------------------------------|
| Changement de la vision depuis la dernière visite | <input type="checkbox"/> Non<br><input type="checkbox"/> Oui, date et détails : _____ |
|---------------------------------------------------|---------------------------------------------------------------------------------------|

|                                                                                                  |       |
|--------------------------------------------------------------------------------------------------|-------|
| Autre complication potentiellement attribuable à l'administration d'acide tranexamique (et date) | _____ |
|--------------------------------------------------------------------------------------------------|-------|

Signature \_\_\_\_\_

Date \_\_\_\_\_
